# Supplementary material
Source: MDPI journal article supplement (https://www.mdpi.com/search?q=molbank-2022-M1453)
Supplement: s002 [file molbank-2022-M1453-s002-mod.mol]

KingDraw KingDraw.mol
  corina  09232214403D 1   1.00000     0.00000 
CORINA 4.4.0 0026  12.08.2021
 20 22  0  0  0  0  0  0  0  0999 V2000
    0.0673   -0.0501   -0.6254 C   0  0  0  0  0  0  0  0  0  0  0  0
    0.0022    1.3110   -0.3814 C   0  0  0  0  0  0  0  0  0  0  0  0
    1.1612    2.0271   -0.1550 C   0  0  0  0  0  0  0  0  0  0  0  0
    2.3880    1.3742   -0.1734 C   0  0  0  0  0  0  0  0  0  0  0  0
    2.4595   -0.0028   -0.4101 C   0  0  0  0  0  0  0  0  0  0  0  0
    1.2819   -0.7054   -0.6406 C   0  0  0  0  0  0  0  0  0  0  0  0
    3.6354   -0.6772   -0.4035 O   0  0  0  0  0  0  0  0  0  0  0  0
    4.8505    0.0274   -0.6539 C   0  0  0  0  0  0  0  0  0  0  0  0
    4.8564    1.2880    0.1716 C   0  0  0  0  0  0  0  0  0  0  0  0
    3.6497    2.1375    0.0542 C   0  0  0  0  0  0  0  0  0  0  0  0
    3.6863    3.4446    0.1425 N   0  0  0  0  0  0  0  0  0  0  0  0
    5.8761    1.6340    0.9658 C   0  0  0  0  0  0  0  0  0  0  0  0
    7.0379    0.7427    1.0875 C   0  0  0  0  0  0  0  0  0  0  0  0
    7.0360   -0.4531    0.3998 C   0  0  0  0  0  0  0  0  0  0  0  0
    6.0052   -0.8095   -0.3916 N   0  0  0  0  0  0  0  0  0  0  0  0
    8.2141   -1.3828    0.5371 C   0  0  0  0  0  0  0  0  0  0  0  0
    8.1811    1.1182    1.9272 C   0  0  0  0  0  0  0  0  0  0  0  0
    9.0853    0.3265    2.1127 O   0  0  0  0  0  0  0  0  0  0  0  0
    8.2290    2.3413    2.4932 O   0  0  0  0  0  0  0  0  0  0  0  0
    9.3898    2.6440    3.3112 C   0  0  0  0  0  0  0  0  0  0  0  0
  1  2  2  0
  2  3  1  0
  3  4  2  0
  4  5  1  0
  5  6  2  0
  6  1  1  0
  7  5  1  0
  8  7  1  0
  9  8  1  0
 10  9  1  0
  4 10  1  0
 10 11  2  0
  9 12  2  0
 12 13  1  0
 13 17  1  0
 13 14  2  0
 14 15  1  0
 15  8  1  0
 14 16  1  0
 19 20  1  0
 17 18  2  0
 17 19  1  0
M  STY  1   1 SUP
M  SLB  1   1   1
M  SAL   1  4  17  18  19  20
M  SBL   1  1  15
M  SMT   1 ^CO2CH3
M  END
$$$$
