# Supplementary material
Source: MDPI journal article supplement (https://www.mdpi.com/search?q=molbank-2022-M1453)
Supplement: s002 [file molbank-2022-M1453-s002.inchi]

InChI=1/C15H14N2O3/c1-8-10(15(18)19-2)7-11-13(16)9-5-3-4-6-12(9)20-14(11)17-8/h3-7,14,16-17H,1-2H3
AuxInfo=1/0/N:16,20,2,1,3,6,12,14,4,13,9,5,10,8,17,11,15,18,19,7/rA:20CCCCCCOCCCNCCCNCCOOC/rB:d1;s2;d3;s4;s1d5;s5;s7;s8;s4s9;d10;d9;s12;d13;s8s14;s14;s13;d17;s17;s19;/rC:80.6317,-53.0272,0;80.6317,-54.5672,0;81.9656,-55.3372,0;83.2991,-54.5672,0;83.2991,-53.0272,0;81.9656,-52.2572,0;84.6327,-52.2572,0;85.9666,-53.0272,0;85.9666,-54.5672,0;84.6327,-55.3372,0;84.6327,-56.8772,0;87.3001,-55.3372,0;88.634,-54.5672,0;88.634,-53.0272,0;87.3001,-52.2572,0;89.9675,-52.2572,0;89.9675,-55.3372,0;89.9675,-55.3372,0;89.9675,-55.3372,0;89.9675,-55.3372,0;
