# Supplementary material
Source: MDPI journal article supplement (https://www.mdpi.com/search?q=molbank-2022-M1453)
Supplement: s002 [file molbank-2022-M1453-s002.mol]

KingDraw KingDraw.mol
KingDraw2D

 20 22  0  0  0  0  0  0  0  0999 V2000
   26.5980  -17.4921    0.0000 C   0  0  0  0  0  0  0  0  0  0  0  0
   26.5980  -18.0001    0.0000 C   0  0  0  0  0  0  0  0  0  0  0  0
   27.0380  -18.2541    0.0000 C   0  0  0  0  0  0  0  0  0  0  0  0
   27.4779  -18.0001    0.0000 C   0  0  0  0  0  0  0  0  0  0  0  0
   27.4779  -17.4921    0.0000 C   0  0  0  0  0  0  0  0  0  0  0  0
   27.0380  -17.2381    0.0000 C   0  0  0  0  0  0  0  0  0  0  0  0
   27.9178  -17.2381    0.0000 O   0  0  0  0  0  0  0  0  0  0  0  0
   28.3578  -17.4921    0.0000 C   0  0  0  0  0  0  0  0  0  0  0  0
   28.3578  -18.0001    0.0000 C   0  0  0  0  0  0  0  0  0  0  0  0
   27.9178  -18.2541    0.0000 C   0  0  0  0  0  0  0  0  0  0  0  0
   27.9178  -18.7621    0.0000 N   0  0  0  0  0  0  0  0  0  0  0  0
   28.7977  -18.2541    0.0000 C   0  0  0  0  0  0  0  0  0  0  0  0
   29.2377  -18.0001    0.0000 C   0  0  0  0  0  0  0  0  0  0  0  0
   29.2377  -17.4921    0.0000 C   0  0  0  0  0  0  0  0  0  0  0  0
   28.7977  -17.2381    0.0000 N   0  0  0  0  0  0  0  0  0  0  0  0
   29.6776  -17.2381    0.0000 C   0  0  0  0  0  0  0  0  0  0  0  0
   29.6776  -18.2541    0.0000 C   0  0  0  0  0  0  0  0  0  0  0  0
   29.6776  -18.2541    0.0000 O   0  0  0  0  0  0  0  0  0  0  0  0
   29.6776  -18.2541    0.0000 O   0  0  0  0  0  0  0  0  0  0  0  0
   29.6776  -18.2541    0.0000 C   0  0  0  0  0  0  0  0  0  0  0  0
  1  2  2  0
  2  3  1  0
  3  4  2  0
  4  5  1  0
  5  6  2  0
  6  1  1  0
  7  5  1  0
  8  7  1  0
  9  8  1  0
 10  9  1  0
  4 10  1  0
 10 11  2  0
  9 12  2  0
 12 13  1  0
 13 17  1  0
 13 14  2  0
 14 15  1  0
 15  8  1  0
 14 16  1  0
 19 20  1  0
 17 18  2  0
 17 19  1  0
M  STY  1   1 SUP
M  SLB  1   1   1
M  SAL   1  4  17  18  19  20
M  SBL   1  1  15
M  SMT   1 ^CO2CH3
M  END
